# Supplementary material for: Elucidation of superionic conduction in K 2 NiF 4 -type Ba–Li oxyhydrides from a first-principles molecular dynamics study
Source: Royal Society of Chemistry journal article supplement (doi:10.1039/d5ta08063k), 2026-01-01
Supplement: d5ta08063k1.pdf [file d5ta08063k1.pdf]

Supplementary Information for:

**Elucidation of superionic conduction in  $K_2NiF_4$ -type  
Ba–Li oxyhydride from first-principles molecular  
dynamics study**

*Jun Haruyama,<sup>\*,†</sup> Fumitaka Takeiri,<sup>†,‡</sup> Genki Kobayashi,<sup>†,§</sup> and Osamu Sugino<sup>†</sup>*

<sup>†</sup>Solid State Chemistry Laboratory, Pioneering Research Institute (PRI), RIKEN, 2-1  
Hirosawa, Wako, Saitama 351-0198, Japan

<sup>‡</sup>Department of Chemistry, Kindai University, 3-4-1 Kowakae, Higashiosaka, Osaka 577-  
8502, Japan

<sup>§</sup>Department of Electrical Engineering and Bioscience, School of Advanced Science and  
Engineering, Waseda University, 3-4-1 Okubo, Shinjuku-ku, Tokyo 169-8555, Japan

<sup>†</sup>The Institute for Solid State Physics, The University of Tokyo, 5-1-5 Kashiwanoha,  
Kashiwa, Chiba 277-8581, Japan

**Corresponding Author**

\*jun.haruyama@riken.jp

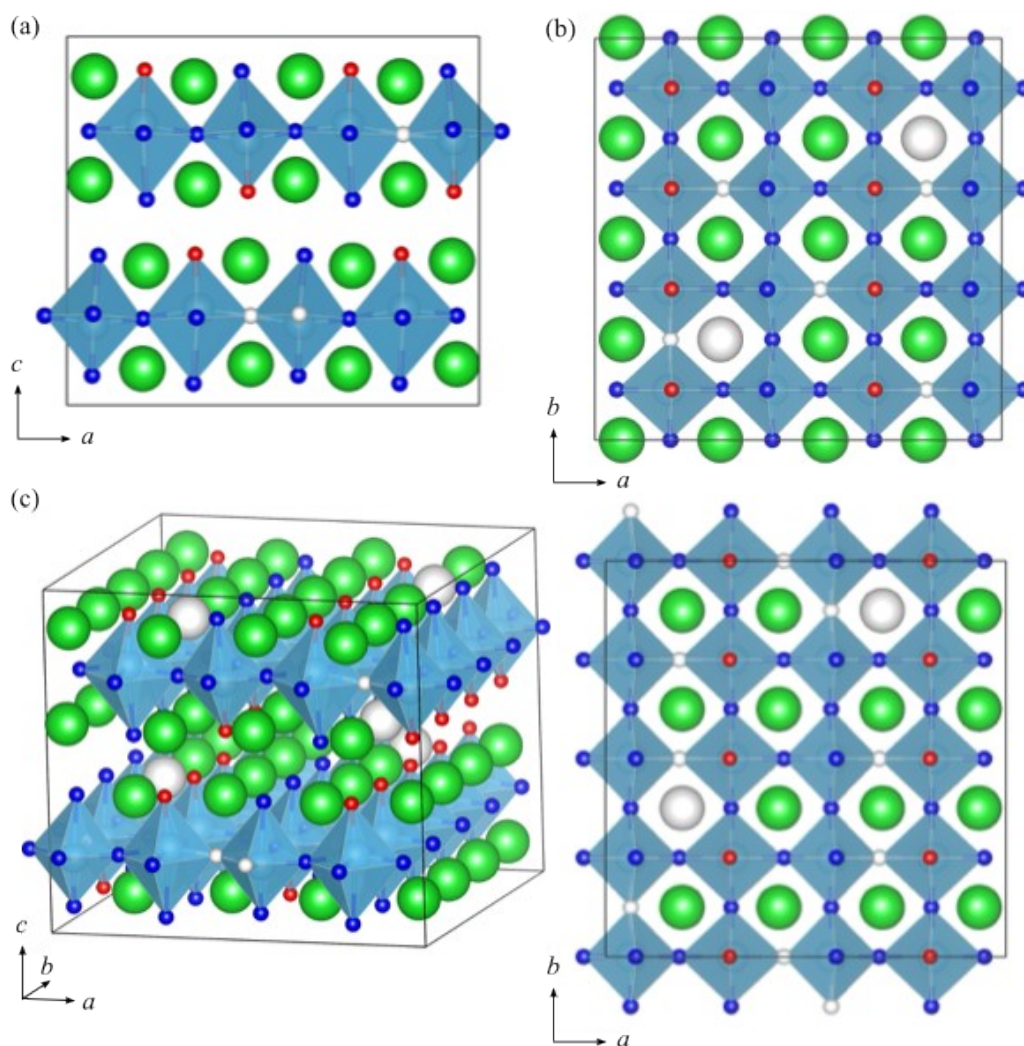

**Figure S1.** (a) Crystal structures of  $\beta$ -like  $\text{Ba}_{56}\text{Li}_{32}\text{H}_{88}\text{O}_{28}$ : (a) side, (b) top (bottom and top layers), and (c) oblique views. Ba, Li, H, and O atoms are depicted as green, light blue, blue, and red spheres, respectively.  $\text{V}_\text{H}$  and  $\text{V}_\text{Ba}$  are depicted as small and big white spheres, respectively. Blue octahedrons and black lines represent the  $\text{LiX}_6$  ( $\text{X} = \text{H}, \text{O}, \text{and } \text{V}_\text{H}$ ) unit and periodic unit cell, respectively.

**Table S1.** Number of atoms, composition ratios, and numbers of  $H_{eq}$  and Ba vacancies in composition change models.

| Number of atoms              | Composition ratio             | $V_H$ | $V_{Ba}$ |
|------------------------------|-------------------------------|-------|----------|
| $Ba_{56}Li_{32}H_{88}O_{28}$ | $Ba_{1.75}LiH_{2.75}O_{0.88}$ | 12    | 8        |
| $Ba_{57}Li_{32}H_{90}O_{28}$ | $Ba_{1.78}LiH_{2.81}O_{0.88}$ | 10    | 7        |
| $Ba_{58}Li_{32}H_{90}O_{29}$ | $Ba_{1.81}LiH_{2.81}O_{0.91}$ | 9     | 6        |

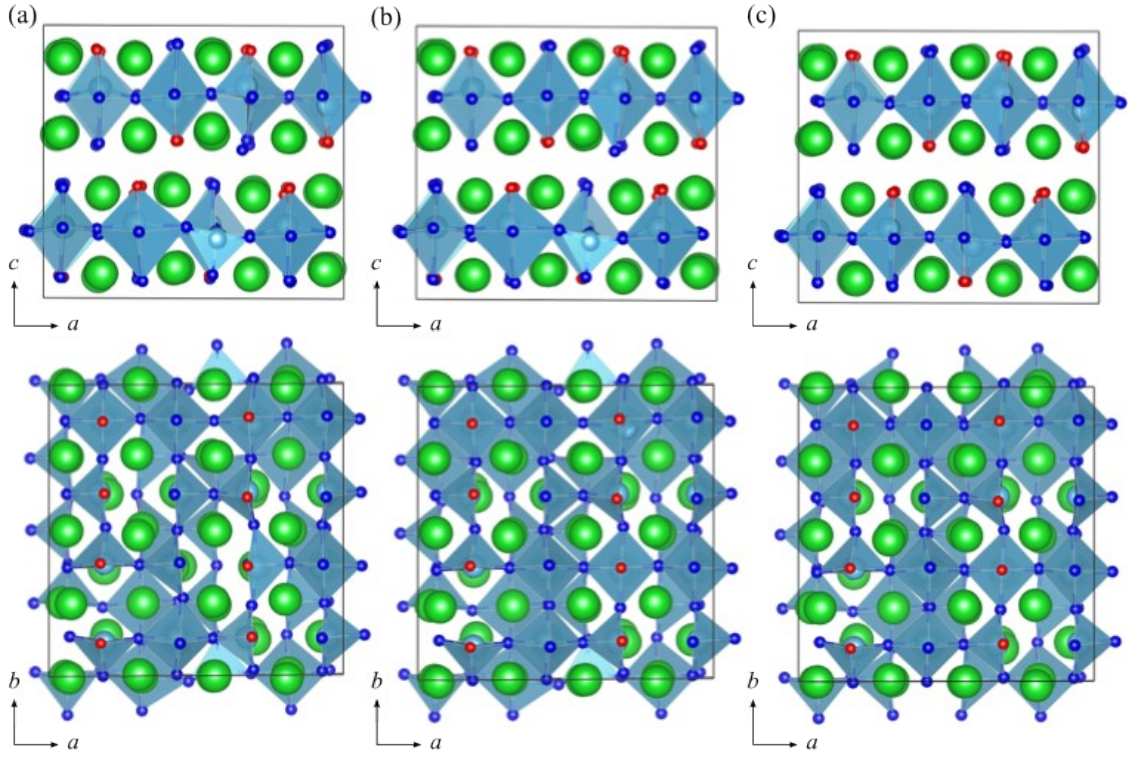

**Figure S2.** (a) Optimized structures of  $\beta$ -like (a)  $Ba_{56}Li_{32}H_{88}O_{28}$ , (b)  $Ba_{57}Li_{32}H_{90}O_{28}$  ( $1V_{Ba}$  and  $2V_H$  in  $Ba_{56}Li_{32}H_{88}O_{28}$  are occupied), and (c)  $Ba_{58}Li_{32}H_{90}O_{29}$  ( $1V_{Ba}$  and  $1V_H$  are occupied and  $1H_{ap}$  is replaced  $1O_{ap}$  in  $Ba_{57}Li_{32}H_{90}O_{28}$ ).

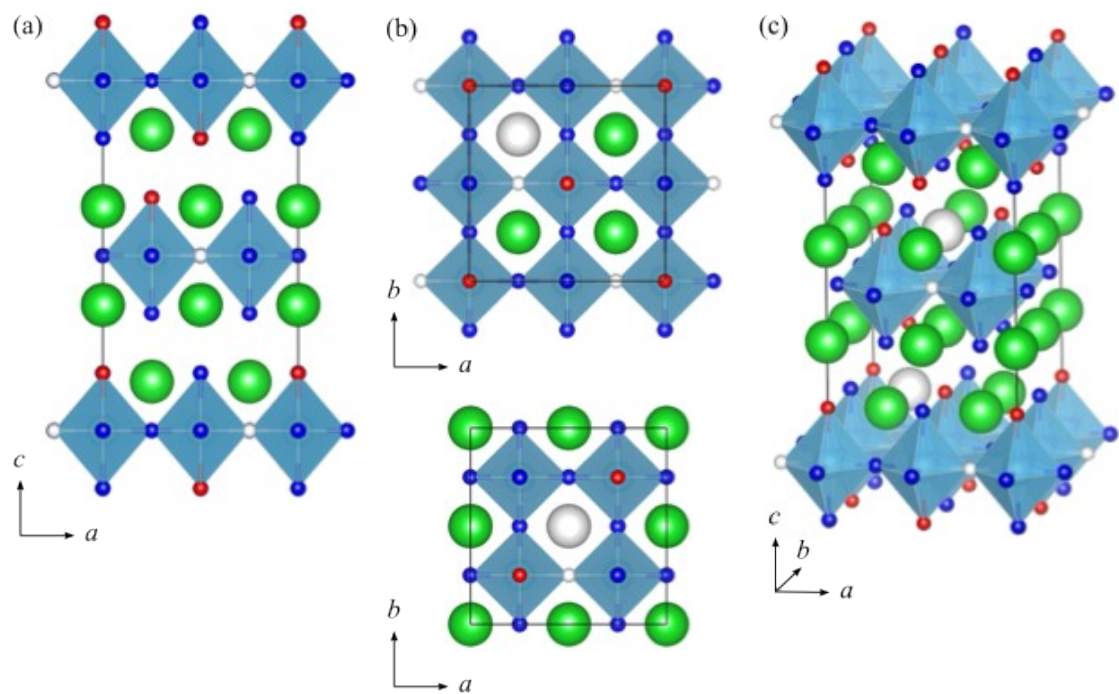

**Figure S3.** (a) Crystal structure of  $\delta$ -like  $\text{Ba}_{14}\text{Li}_8\text{H}_{22}\text{O}_7$ : (a) side, (b) top (bottom and middle layers), and (c) aerial views.



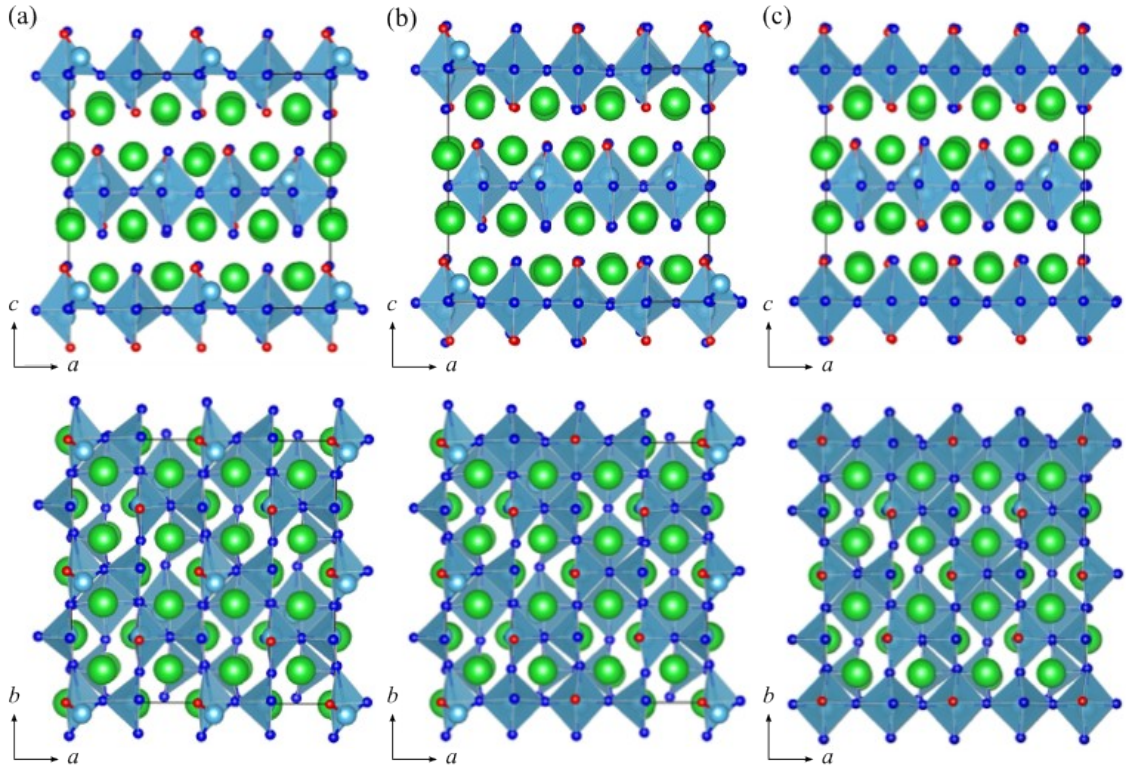

**Figure S4.** (a) Optimized structures of  $\delta$ -like (a)  $\text{Ba}_{56}\text{Li}_{32}\text{H}_{88}\text{O}_{28}$  ( $2\times 2\times 1$  duplication cell of  $\text{Ba}_{14}\text{Li}_8\text{H}_{22}\text{O}_7$ ), (b)  $\text{Ba}_{57}\text{Li}_{32}\text{H}_{90}\text{O}_{28}$ , and (c)  $\text{Ba}_{58}\text{Li}_{32}\text{H}_{90}\text{O}_{29}$ .

**Table S2.** Mimicked phases, numbers of atoms, optimized lattice constants ( $a$ ,  $b$ , and  $c$ ), and calculated bandgaps  $E_{\text{gap}}$  of composition change models.

| phase          | Number of atoms                                          | $a$ [ $\text{\AA}$ ] | $b$ [ $\text{\AA}$ ] | $c$ [ $\text{\AA}$ ] | $E_{\text{gap}}$ [eV] |
|----------------|----------------------------------------------------------|----------------------|----------------------|----------------------|-----------------------|
| $\beta$ -like  | $\text{Ba}_{56}\text{Li}_{32}\text{H}_{88}\text{O}_{28}$ | 15.82                | 15.74                | 14.47                | 2.69                  |
|                | $\text{Ba}_{57}\text{Li}_{32}\text{H}_{90}\text{O}_{28}$ | 15.81                | 15.76                | 14.45                | 2.60                  |
|                | $\text{Ba}_{58}\text{Li}_{32}\text{H}_{90}\text{O}_{29}$ | 15.83                | 15.78                | 14.38                | 2.59                  |
| $\delta$ -like | $\text{Ba}_{56}\text{Li}_{32}\text{H}_{88}\text{O}_{28}$ | 15.724               | 15.999               | 14.395               | 2.43                  |
|                | $\text{Ba}_{57}\text{Li}_{32}\text{H}_{90}\text{O}_{28}$ | 15.754               | 15.967               | 14.332               | 2.34                  |
|                | $\text{Ba}_{58}\text{Li}_{32}\text{H}_{90}\text{O}_{29}$ | 15.775               | 15.939               | 14.301               | 2.23                  |

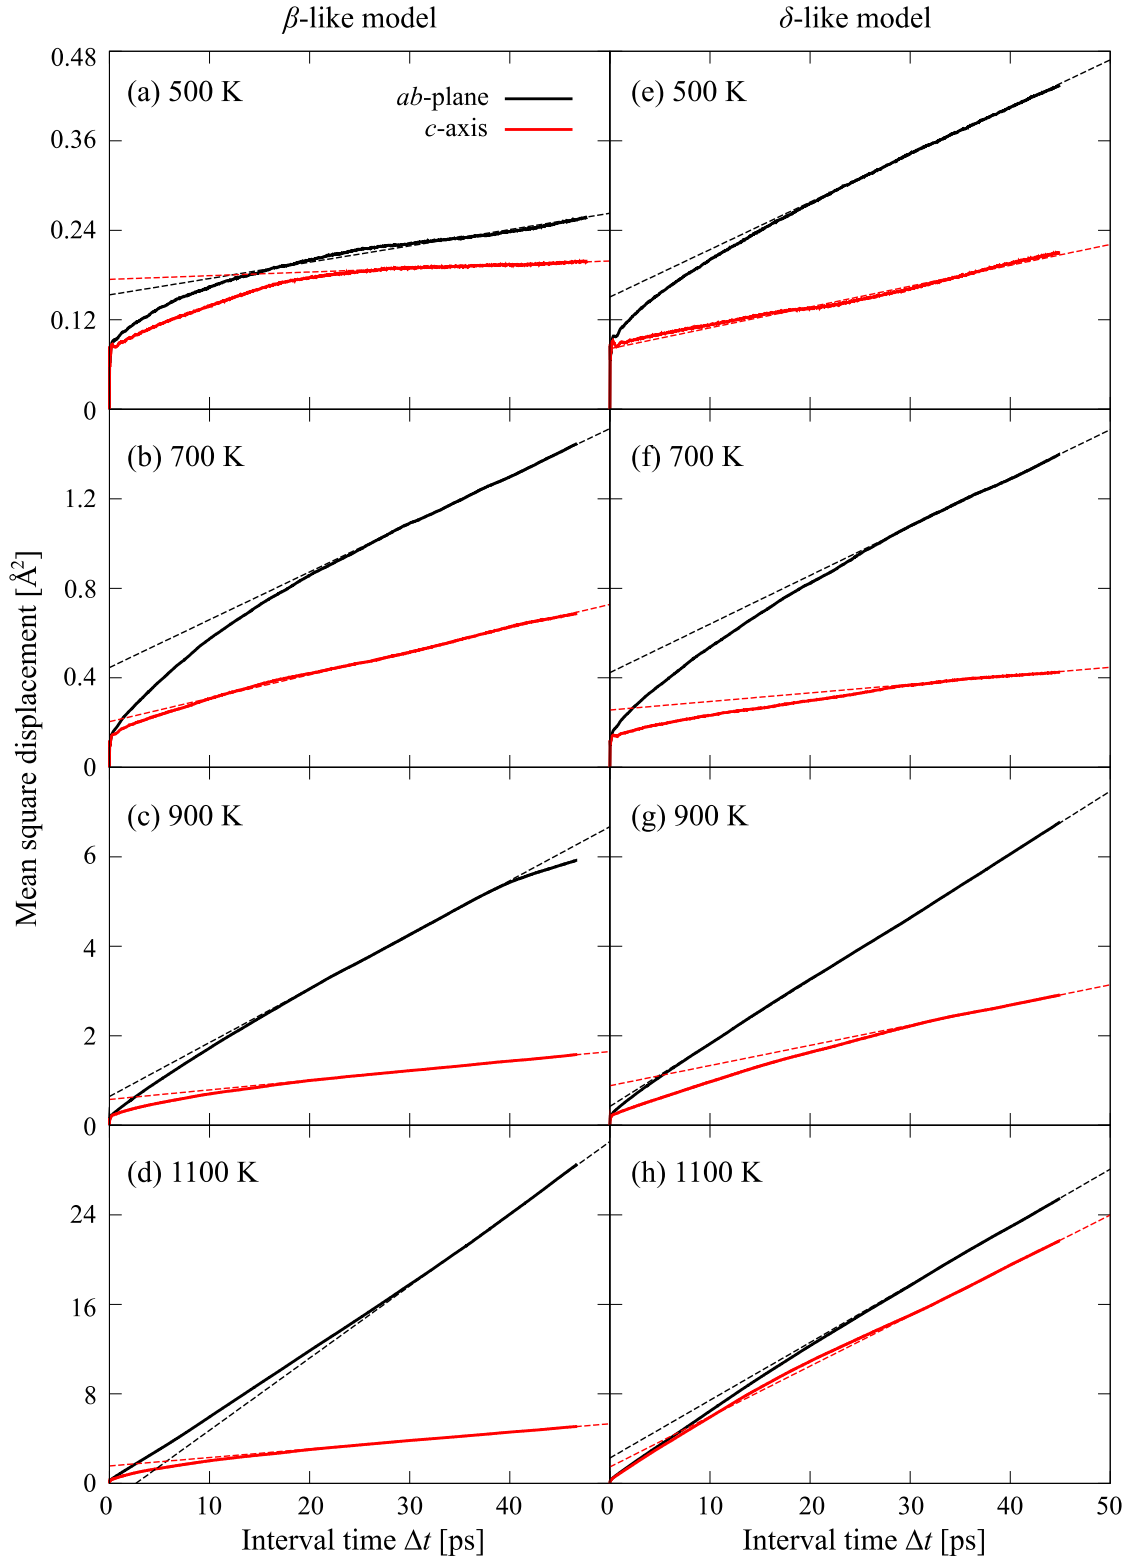

**Figure S5.** Mean square displacements of H,  $\sum_i^N \langle |\mathbf{r}_i(t + \Delta t) - \mathbf{r}_i(t)|^2 \rangle$ , obtained by (a–d)  $\beta$ - and (e–h)  $\delta$ -like models at controlled temperatures. Black and red solid lines represent  $ab$ -plane and  $c$ -axis

components, respectively. Dashed lines indicate fitted line slope by linear interpolation.

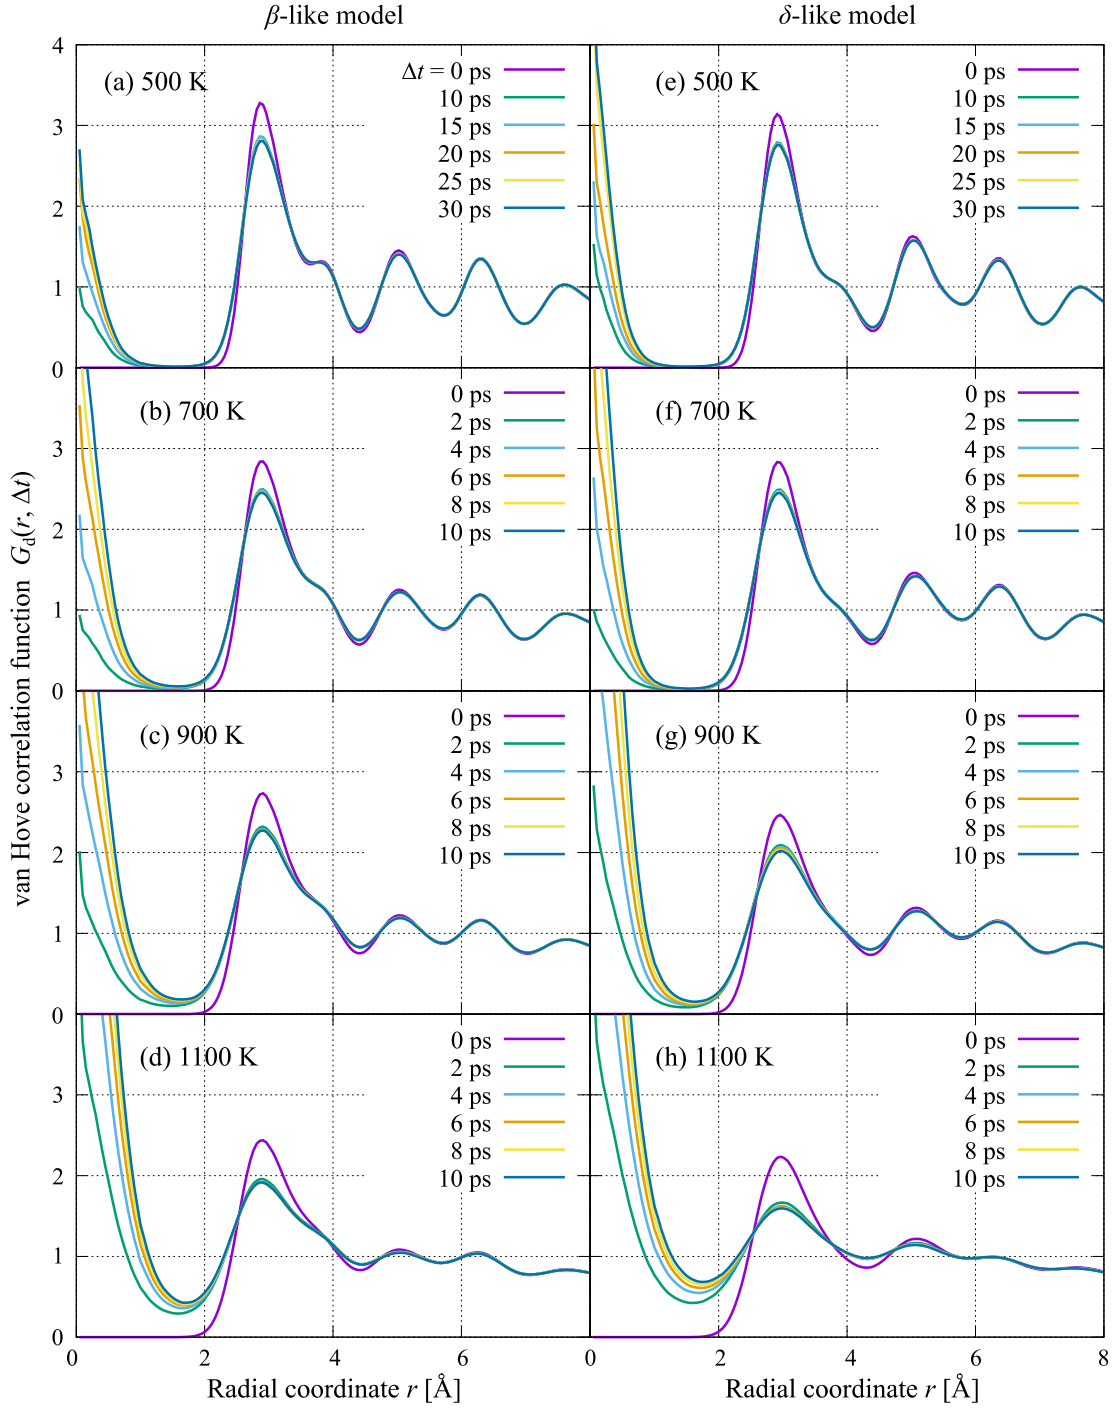

**Figure S6.** van Hove correlation function  $G_d(r, \Delta t)$  as a function of radial coordinate  $r$  obtained by (a–d)  $\beta$ - and (e–h)  $\delta$ -like models at controlled temperatures. Colors correspond to the extracted interval times  $\Delta t$  as shown in subset.



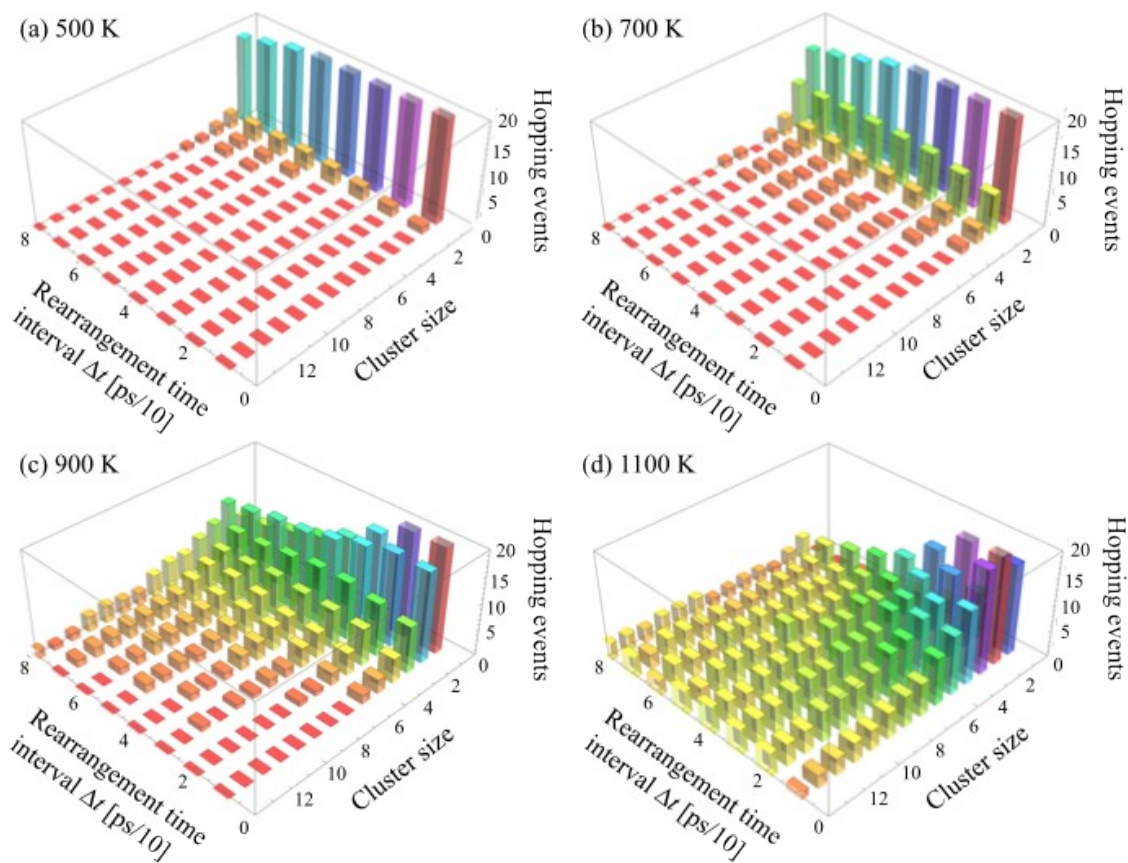

**Figure S7.** Aerial views of hopping events as functions of cluster size and rearrangement time interval obtained at the controlled temperatures of (a) 500, (b) 700, (c) 900, and (d) 1100 K. Colors of rods correspond to their height.

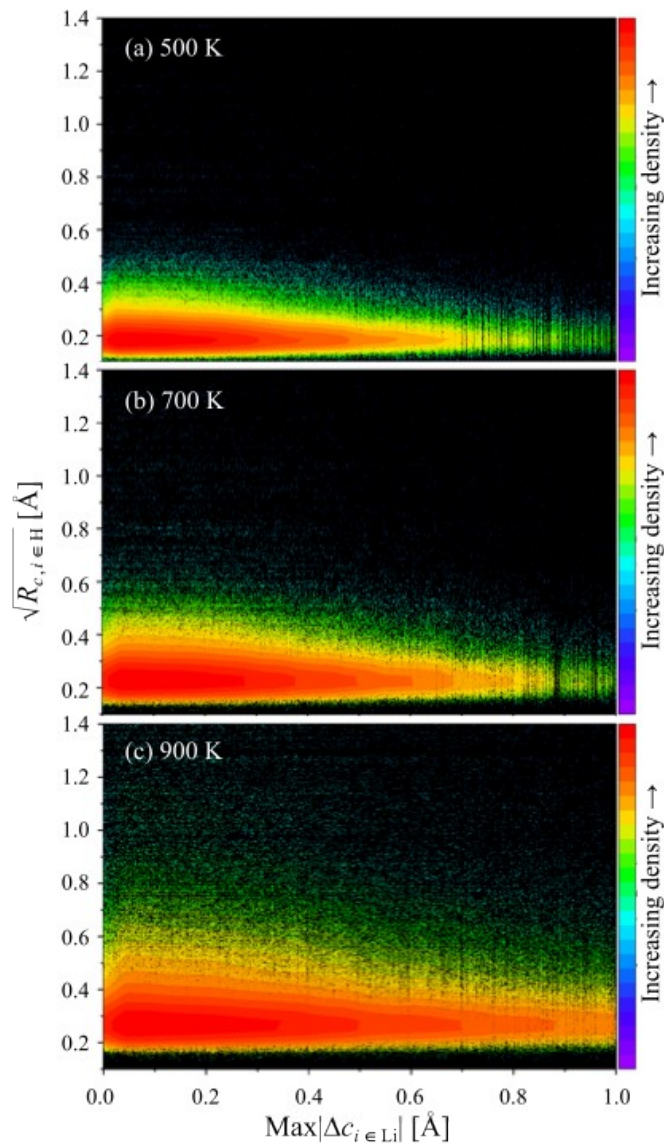

**Figure S8.** Correlation between Li and H motions. Plot is based on distribution of data points ( $x(t)$ ,  $\{y(t)\}$ ) at every simulation step, where  $x(t)$  and  $y(t)$  corresponds to the  $c$ -axis components of maximum absolute value of Li atom displacements,  $\max|\Delta c_{i \in \text{Li}}|$ , and root value of rearrangement indicator of H atom,  $\sqrt{R_{c, i \in \text{H}}}$ , respectively. H atoms connected Li via  $\text{LiX}_6$  tetrahedrons are only considered. Rearrangement indicators were calculated by using the time interval of 0.5 ps.
